# Supplementary material for: Confronting the Crisis of COVID-19
Source: Atypon-hosted journal article supplement (doi:10.1027/2157-3891/a000053), 2022-07-01
Supplement: 2157-3891_a000053_esm1.pdf [file 2157-3891_a000053_esm1.pdf]

## Electronic Supplemental Material

### Electronic Supplemental Material #1

#### *Messaging*

Several phrases were identified to maintain fluid messaging and conference objectives, as shown in this figure.

The logo for 'ecoversity' features the word in a green, lowercase, sans-serif font. The letter 'o' is replaced by a circular icon of a globe with latitude and longitude lines.

We are coming together in community for an all-day online conference titled, **“COVID-10 - What’s Next?”**. We are gathering for Mental Health Awareness month and diving deep to learn from world-renowned educators discussing:

- Permaculture
- Positive Psychology
- Community
- Health
- Vision

As well as guided discussion rooms, meditation and movement practices to hold space for growth, guidance, conversation and practicality. Who are you most excited to learn from? Share Below!

#EcoversityOnlineConference #WhatsNextOnlineConference #WhatsNextSupportSession  
#MentalHealthAwarenessMonth
