# Supplementary material for: Confronting the Crisis of COVID-19
Source: Atypon-hosted journal article supplement (doi:10.1027/2157-3891/a000053), 2022-07-01
Supplement: 2157-3891_a000053_esm2.pdf [file 2157-3891_a000053_esm2.pdf]

## Electronic Supplemental Material

### Electronic Supplemental Material #2

#### *Engagement of Participants*

The core team created a one-pager to send to potential partners to gauge their interest in participating. As shown in this figure, the messaging included a description of the conference, conference partners, key teaching points, and target audience.



***COVID-19: What's Next?***  
***A One-Day Online Conference + Discussion***  
*Presented by Ecoversity in Collaboration with Laurie M. Tisch Center for Food, Education & Policy; Teachers College, Columbia University, Unify*  
*ALL PROCEEDS will be donated to Corbin Hill Food Project*  
*Hosted by Zoom + Facebook Live*

***When?***  
Sunday, May 17

***What It Is:***  
A virtual conference to bridge mental health, education, and environmental initiatives that will aid people to thrive in their microworlds during this crisis, as well as supplying them with knowledge for the future. We will culminate with a collective exploration of the question, ***“What’s next?”***

***What’s Next?*** will combine the principles of permaculture, positive psychology, community, health (movement) & leadership by bringing world leaders together for an Online Conference and Discussion to provide proactive tips for families, communities, and educators to thrive during this time.

***Focus Teaching Points:***

- Delivering a conversation around ***“What’s Next”*** in the categories of environmental initiatives, ecopsychology, and public and mental health
- Providing professional research and expertise on topics surrounding panic, staying at home, how to handle the future, inclusion, etc.
- Providing aid + action steps to help to integrate back people back into the “everyday” life or

supplying professional advice on how to adapt to our new normal  
- Providing direct and informational tips and tricks for people needing aid in their microworlds

*We will be aiding teachers in creating workshop titles and descriptions so that they fit the theme of “**What’s Next?**”*

**Desired Target Audience(s):**

*(18 - 75 age group)*

Families & Individuals at Home During COVID-19

Students (Collegiate + Grad)

Educators (Professors, High School Teachers, Workshop Leaders, Retreat Leaders)

Schooling Executives (Principals, Superintendents, Social Workers)

*If you are interested in participating or speaking at this conference, please reply to this document with what you would like to contribute, your professional bio, and the offering that you would like to bring.*
