# Supplementary material for: Confronting the Crisis of COVID-19
Source: Atypon-hosted journal article supplement (doi:10.1027/2157-3891/a000053), 2022-07-01
Supplement: 2157-3891_a000053_esm4.pdf [file 2157-3891_a000053_esm4.pdf]

## Electronic Supplemental Material

### Electronic Supplemental Material #4

#### *Program Agenda*

This figure shows the actual program agenda, which was described in the paper.



**Program Agenda:**  
*Introduced by Alexa Rosenthal + Stephen Brooks: Co-Founders, Ecoversity and Shelby Parks, Graduate Student, Columbia University Teachers College*

**Part 1**

Moderated by: Alexa Rosenthal and Shelby Parks

**9:00 AM - 9:30 AM | Introduction Meditation**  
Raamayan Ananda + Andrea Belen - “Grounding Meditation - Intention Setting”

**9:30 AM - 9:45 AM | Introductory Song + Welcome**  
Stephen Brooks: “What is Ecoversity”

**9:45 AM - 10:00 AM | Speaker 1**  
Dennis Derryck - A Word About Corbin Hill Food Project - COVID-19 Moderated by  
Dr. Pamela Koch: Executive Director, Laurie M. Tisch Center for Food, Education &  
Policy

\*3-minute music intermission by *Rising Appalachia*

**10:00 AM - 10:20 AM | Speaker 2**  
Dan Tomasulo - “Learned Hopefulness: The Science of Hope in a Time of Crisis ”  
*10:20 AM - 10:30 AM | Q&A*

\*3-minute music intermission by *Rising Appalachia*

**10:30 AM - 10:50 AM | Speaker 3**

Andres Cambroner - “Agroindustry or Agroecology: Biodiversity, Solidarity and Community”

*10:50 AM - 11:00 AM | Q&A*

\*3-minute music intermission by *Rising Appalachia*

**11:00 AM - 11:20 AM | Speaker 4**

Ms. Yenory Hernandez-Garbanzo -” How to Use Food & Your Home as an Educational Lab”

*11:20 AM - 11:30 AM | Q&A*

\*3-minute music intermission by *Rising Appalachia*

**11:30 AM - 11:50 AM | Speaker 5**

Dr. Judy Kuriansky - “Mental Health and Well-Being for the People and the Planet: Principles and Practices”

*11:50 AM - 12:00 PM | Q&A*

\*3-minute music intermission by *Rising Appalachia*

**12:00 PM - 12:50 PM | Speaker 6**

Carin Rockind - Your Purpose: How to Make This Moment The Most Powerful Time in Your Life

*12:50 PM - 1:00 PM | Q&A*

\*3-minute music intermission by *Rising Appalachia*

**1:00 PM - 1:20 AM | Speaker 7**

Penny Livingston - Skill Building, Ecoliteracy and Relationship: Being Useful in an Emerging Culture

*1:20 AM - 1:30 AM | Q&A*

\*3-minute music intermission by *Rising Appalachia*

**1:30 PM - 1:50 PM | Speaker 8**

Stephen Brooks - “The Global Redesign 1001: Redesigning the World 1001 Hectares at a Time”

*1:50 PM - 2:00 PM | Q&A*

\*3-minute music intermission by *Rising Appalachia*

## **Part 2**

### **2:00 PM - 3:05 PM | Panel #1 - Q&A**

Moderated By Stephen Brooks: “Co-Creation: A Deep Dive w/ Rob Greenfield, Miki Agrawal, Derek Broze, Charles Eisenstein”

\*3-minute music intermission by *Rising Appalachia*

### **3:05 PM - 4:05 PM | Panel #2 - Q&A**

Moderated By Stephen Brooks: “Exploring The "Visions" Behind Visionary Art For What's To Come w/ Amanda Sage, Chris Dyer, Alex & Allyson Grey”

### **4:15 AM - 5:00 PM | Closing Song + Dance**

Amber Ryan - “360 Ground Connection Movement”

\*The day consisted of three-minute video music breaks after each talk by American folk music group, *Rising Appalachia*, performing from Costa Rica.
